# Supplementary material for: Hyaluronan and elastin-like protein (HELP) gels significantly improve microsphere retention in the myocardium
Source: Royal Society of Chemistry journal article supplement (doi:10.1039/d1bm01890f), 2022-01-01
Supplement: d1bm01890f1.pdf [file d1bm01890f1.pdf]

Electronic Supplementary Information

## Supporting Information

Riley A. Suhar<sup>a</sup>, Vanessa M. Doulames<sup>a,b</sup>, Yueming Liu<sup>a</sup>, Meghan E. Hefferon<sup>a,b</sup>, Oscar Figueroa III<sup>c</sup>, Hana Buabbas<sup>a,d</sup>, Sarah C. Heilshorn<sup>a\*</sup>

<sup>a</sup> Department of Materials Science and Engineering, Stanford University, Stanford, California 94305, USA

<sup>b</sup> Department of Neurosurgery, Stanford University School of Medicine, Stanford, California 94305, United States

<sup>c</sup> Ellicott City, Maryland 21043, USA, ozzief@alum.mit.edu

<sup>d</sup> Department of Biology, Stanford University, Stanford, California, 94305, United States

\* Corresponding author.

E-mail: [heilshorn@stanford.edu](mailto:heilshorn@stanford.edu) (S.C.H.)

Address: 476 Lomita Mall, McCullough Room 246, Stanford University.  
Stanford, CA, 94305-4045, USA

Fax Number: 650-723-3044

### Summary:

Figure S1: Elastin-like protein amino acid sequence information

Figure S2: NMR quantification of modification efficiency for ELP-Hydrazine

Figure S3: Summary of conjugation and oxidation reactions for hyaluronan

Figure S4: TNBS assay for measuring degree of oxidation:

Figure S5: NMR quantification of modification efficiency for aldehyde (HA-A) and benzaldehyde (HA-B) modified HA

Figure S6: Gel permeation chromatography (GPC) measurements of hyaluronans

Figure S7: Representative time sweeps

Figure S8. Summary of Matrigel mechanics

Figure S9: Lower critical solution temperature (LCST) shift

Figure S10: Representative injection videos

Figure S11: Catheter injection video of HA16

Figure S12: Recovery experiment for HA16 and HA24

Figure S13: Post-recovery frequency sweep

Figure S14: Representative stress and strain curves

Figure S15: *Ex-vivo* hydrogel fluorescence and microsphere concentration determination

Figure S16: Summary of test group mechanics

Figure S17: Representative Injection Images

Figure S18: Injection scoring

Figure S19: Tissue sectioning schematic

Figure S20: Example images of microsphere and hydrogel retention quantification

Figure S21: Python script for post-processing microsphere count

Figure S22: Sex-based differences in microsphere retention

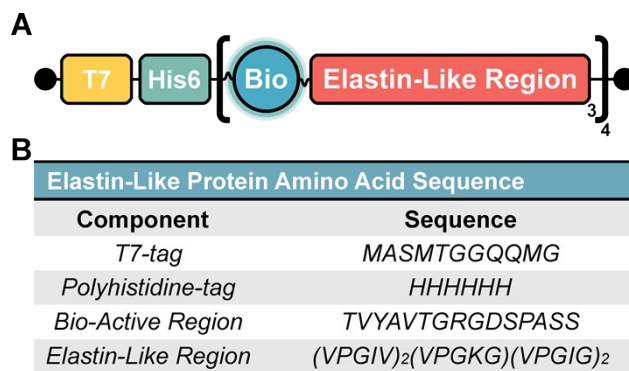

1 **Figure S1. Elastin-like protein amino acid sequence information:** (A) A schematic representation of the  
 2 elastin-like protein (ELP) used in the present manuscript. Our ELP contains three key-components: (1) a  
 3 tag region with a T7-tag and Polyhistidine-tag, (2) a bio-active domain and (3) an elastin-like region. (B)  
 4 The amino acid sequence for these components are included for reference.

**NMR Quantification:**

5 Hydrazine functionalization: dissolve ~10 mg of the Boc-protected ELP-Hydrazine intermediate in  
6 ~750  $\mu\text{L}$  deuterated DMSO and analyze by  $^1\text{H}$  NMR (500 Hz, DMSO- $d_6$ ): Tetramethyl silane  
7 (TMS; 0). Efficiency of modification is determined by comparing the integrated signal of the Boc  
8 protons (27H;  $\delta$  1.5-1.35) to the aromatic protons of tyrosine residues on ELP (8H each; centered  
9 at  $\delta$  7.00 and 6.62).

*RGD-ELP with Boc Protecting Group*

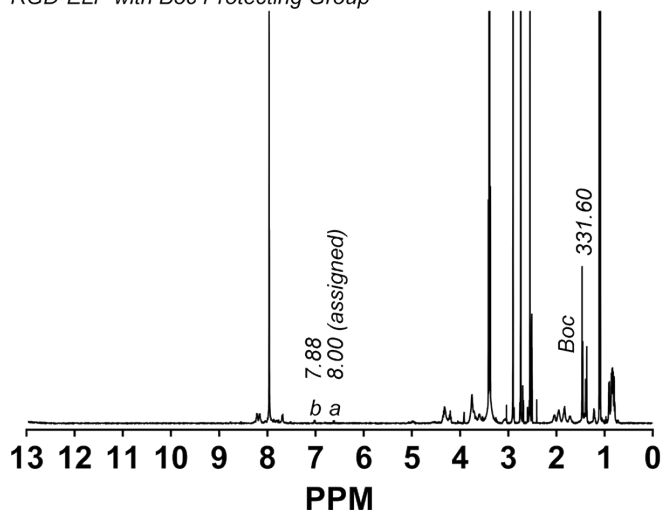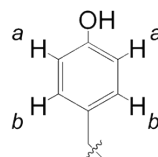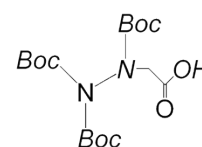

10 **Figure S2. NMR quantification of modification efficiency for ELP-Hydrazine: NMR of Boc-protected**  
11 *ELP indicates approximately 12.28 hydrazine moieties are present per ELP chain.*

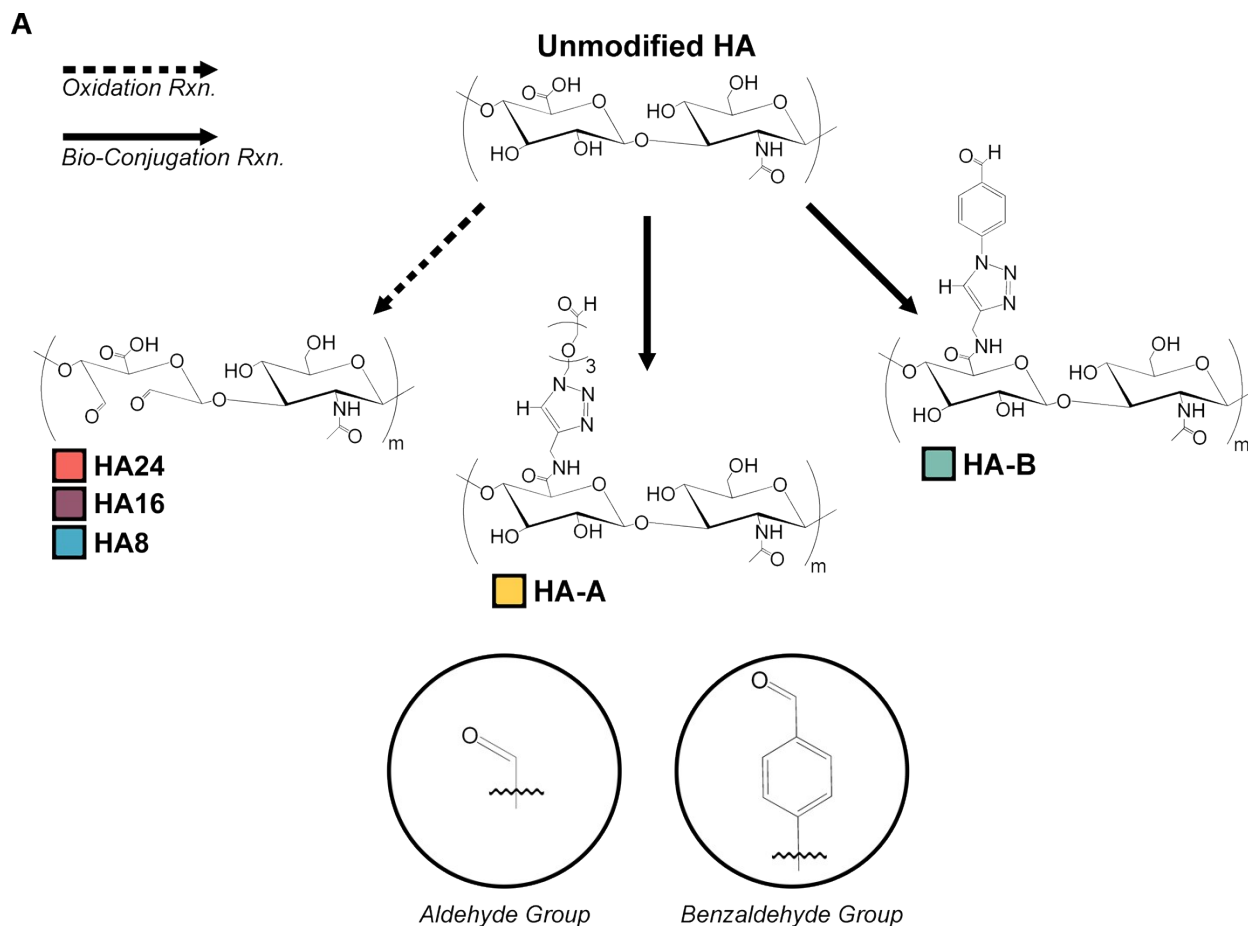**B**

| Hydrogel Summary |                         |                     |               |
|------------------|-------------------------|---------------------|---------------|
| Hydrogel         | Starting M <sub>w</sub> | Modification Scheme | Bond Kinetics |
| HA24             | 1.5 MDa                 | Oxidation (24 hr)   | Fast          |
| HA16             | 1.5 MDa                 | Oxidation (16 hr)   | Fast          |
| HA8              | 1.5 MDa                 | Oxidation (8 hr)    | Fast          |
| HA-A             | 100 kDa                 | Bio-Conjugation     | Fast          |
| HA-B             | 100 kDa                 | Bio-Conjugation     | Slow          |

12 **Figure S3. Summary of conjugation and oxidation reactions for hyaluronan:** (A) A schematic  
 13 representation of our different hyaluronan (HA) components. Three variants were produced by oxidizing  
 14 1.5 MDa HA for 24 hr (HA24), 16 hr (HA16), and 8 hr (HA8). The other two HA variants were produced via  
 15 2-part bio-conjugation reaction wherein 100 kDa HA was first reacted to have 12% of the HA repeat groups  
 16 modified with an alkyne group (HA-Alkyne). A secondary reaction then conjugated a small molecule with  
 17 either a pendant aldehyde (HA-A) or benzaldehyde group (HA-B) to the alkyne through a copper-click  
 18 reaction. (B) A summary of our HA groups and relevant properties have been summarized.

19 **2,4,6-Trinitrobenzene Sulfonic Acid (TNBS) Assay:**

20 The degree of HA oxidation for our oxidized HA variants (HA24, HA16, and HA8) was measured  
21 using a modified TNBS assay, as previously described [1]. HA samples were dissolved in ultra  
22 pure DI water at 0.6% (w/v) overnight. The following morning, 25  $\mu\text{L}$  of HA was mixed with 25  $\mu\text{L}$   
23 tert-butyl carbazate (t-BC; 30 mM; 1% aqueous trichloroacetic acid; Sigma, B91005) and left to  
24 react for 24 hr at room temperature in the dark. The following day, 5  $\mu\text{L}$  of sample was diluted  
25 with 995  $\mu\text{L}$  sodium bicarbonate buffer (0.1M, pH 8.5). 500  $\mu\text{L}$  of diluted sample was then mixed  
26 with 250  $\mu\text{L}$  aqueous TNBS (0.1%, diluted with 0.1M sodium bicarbonate; Thermo, 28997) and  
27 left to react with the excess t-BC for 2 hr at 37 °C. The reaction was stopped by the careful addition  
28 of 125  $\mu\text{L}$  of 1 M hydrochloric acid, and 100  $\mu\text{L}$  of the mixture was finally transferred into a 96 -  
29 well assay plate. The absorbance at 340 nm was measured using a SpectraMax M2 microplate  
30 reader. A standard calibration curve made from the aqueous t-BC solutions (1 – 20 mM; diluted  
31 with 0.1M sodium bicarbonate) was used to determine the amount of unreacted t-BC and  
32 to convert the result into di-aldehyde content. All measurements were repeated in triplicate.

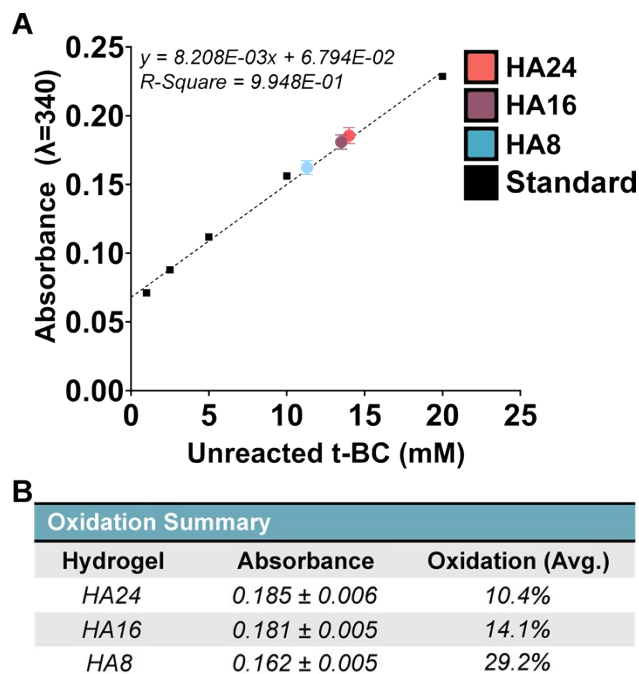

33 **Figure S4. TNBS assay for measuring degree of oxidation:** *The dialdehyde content of our oxidized*  
 34 *variants (HA24, HA16, and HA8) were determined through a modified, two-part, TNBS assay. First, the*  
 35 *aldehyde groups were reacted with a known quantity of tert-butyl carbazate (t-BC) to form a stable*  
 36 *carbazone. The remaining unreacted, t-BC content was determined by subsequent reaction with TNBS,*  
 37 *which forms a chromogenic derivative that can be detected at  $\lambda = 340$  nm. (A) Our measurements (in*  
 38 *triplicate) are plotted against a standard curve. (B) The results are further summarized in a table below for*  
 39 *ease of comparison.*

**NMR Quantification:**

40 Aldehyde functionalization: dissolve ~10 mg of HA-Aldehyde (HA-A) in ~750  $\mu\text{L}$  of  $\text{D}_2\text{O}$  and  
 41 analyze by  $^1\text{H}$  NMR (500 Hz,  $\text{D}_2\text{O}$ ): TMS (0); Acetyl group (3H,  $\delta \sim 1.8$ ); water ( $\delta \sim 4.7$ ); triazole  
 42 (1H;  $\delta \sim 7.85$ ). To quantify the degree of modification, compare the integrated peak of the triazole  
 43 group to the acetyl group.

44 Benzaldehyde functionalization: dissolve ~10 mg of HA-Benzaldehyde (HA-B) in ~750  $\mu\text{L}$  of  $\text{D}_2\text{O}$   
 45 and analyze by  $^1\text{H}$  NMR (500 Hz,  $\text{D}_2\text{O}$ ): TMS (0); Acetyl group (3H,  $\delta \sim 1.8$ ); water ( $\delta \sim 4.7$ );  
 46 triazole (1H) and aldehyde group (1H  $\delta \sim 9.8 \sim 9.9$ ). To quantify the degree of modification,  
 47 compare the integrated peak of the aldehyde proton to the acetyl group.

**A**

HA-Aldehyde (HA-A)

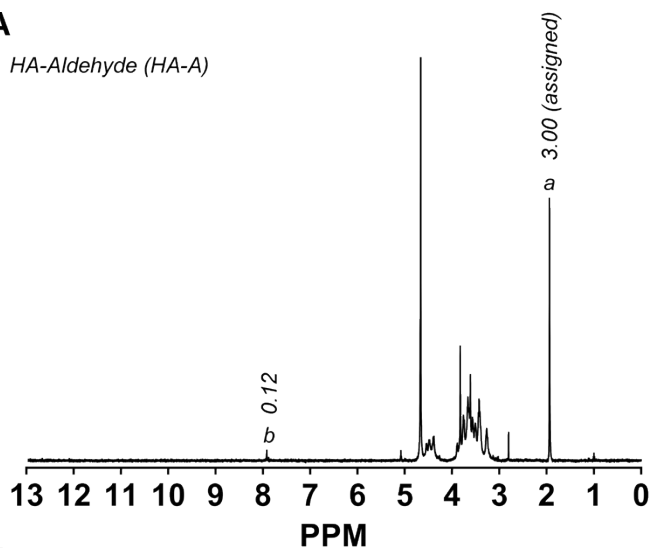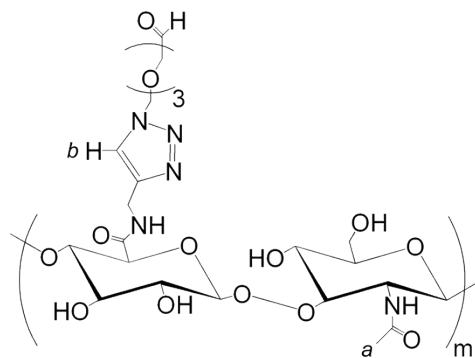**B**

HA-Benzaldehyde (HA-B)

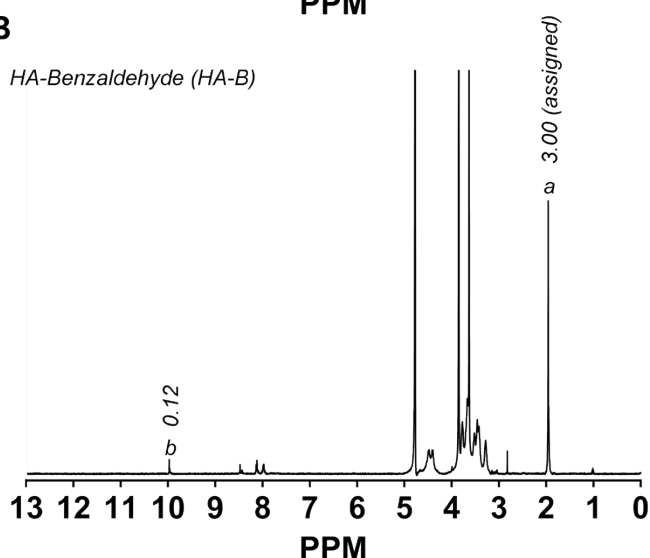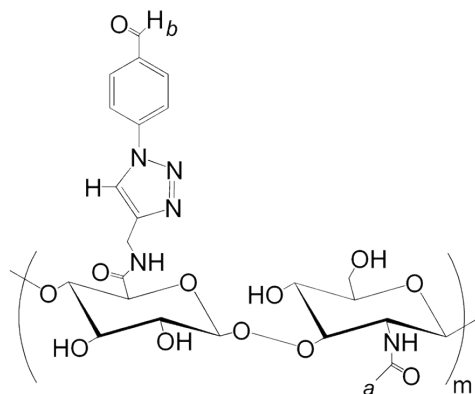

48 **Figure S5: NMR quantification of modification efficiency for aldehyde (HA-A) and benzaldehyde**  
49 **(HA-B) modified HA:** *NMR of both (A) HA-A and (B) HA-B show approximately 12% of the available*  
50 *carboxylic acid sites have been modified with either aldehyde or benzaldehyde groups, respectively.*



51 **Gel Permeation Chromatography:**

52 Gel permeation chromatography (GPC) was carried out using a Dionex Ultimate 3000 instrument  
53 (including pump, autosampler, and column compartment). Detection consisted of an Optilab TrEX  
54 (Wyatt Technology Corporation) refractive index detector operating at 658 nm and a HELEOS II  
55 light scattering detector (Wyatt Technology Corporation) operating at 659 nm. The column used  
56 was a Superose 6 increase 10/300 GL. The eluent was PBS buffer with 30% (w/v)  $\text{NaN}_3$ , 137 mM  
57 NaCl, 0.0027 mM KCl, 10 mM Phosphate pH 7.3, at  $0.75 \text{ mL min}^{-1}$  at RT. HA samples of 1.5  
58 MDa, 1 MDa at  $1 \text{ mg mL}^{-1}$ , and other analyte samples at  $3 \text{ mg mL}^{-1}$  were dissolved in ultra-pure  
59 DI water overnight and filtered through Millipore Express PES membrane filter with 0.22 pore size  
60 prior to injection. A refractive index increment ( $dn/dc$ ) value of 0.165 was applied for all samples.  
61 The time frame for integration was determined by running multiple unmodified HA samples (20  
62 kDa, 40 kDa, 60 kDa, 100 kDa, 500 kDa, 1 MDa; (Lifecore), and 1.5 MDa (Sigma)) as a reference  
63 and then applying the same integration time for our experimental samples (HA24, HA16, HA8,  
64 HA-A, and HA-B). Values represent the approximated weight average molecular weight ( $M_w$ ),  
65 number average molecular weight ( $M_n$ ) and the polydispersity index (PDI).

66 **Dynamic Light Scattering for Measuring Hydrodynamic Radius:**

67 50  $\mu\text{L}$  of each HA sample were dissolved in PBS at a final concentration of 1% (w/v). Then, 40  $\mu\text{L}$   
68 of sample were transferred into disposable cuvettes (BrandTech, 759200) and sealed with a cap  
69 (VWR, 47744-636) to prevent any evaporation during measurements. We then performed a size  
70 measurement using the Zetasizer Nano NS, with three replicate measurements per sample. From  
71 these measurements, and assuming the viscosity of water, we were able to determine the z-  
72 average size for each sample from which we could then determine an approximate hydrodynamic  
73 radius ( $R_h$ ). The  $R_h$  values provided presently represent the average of three independent,  
74 samples.

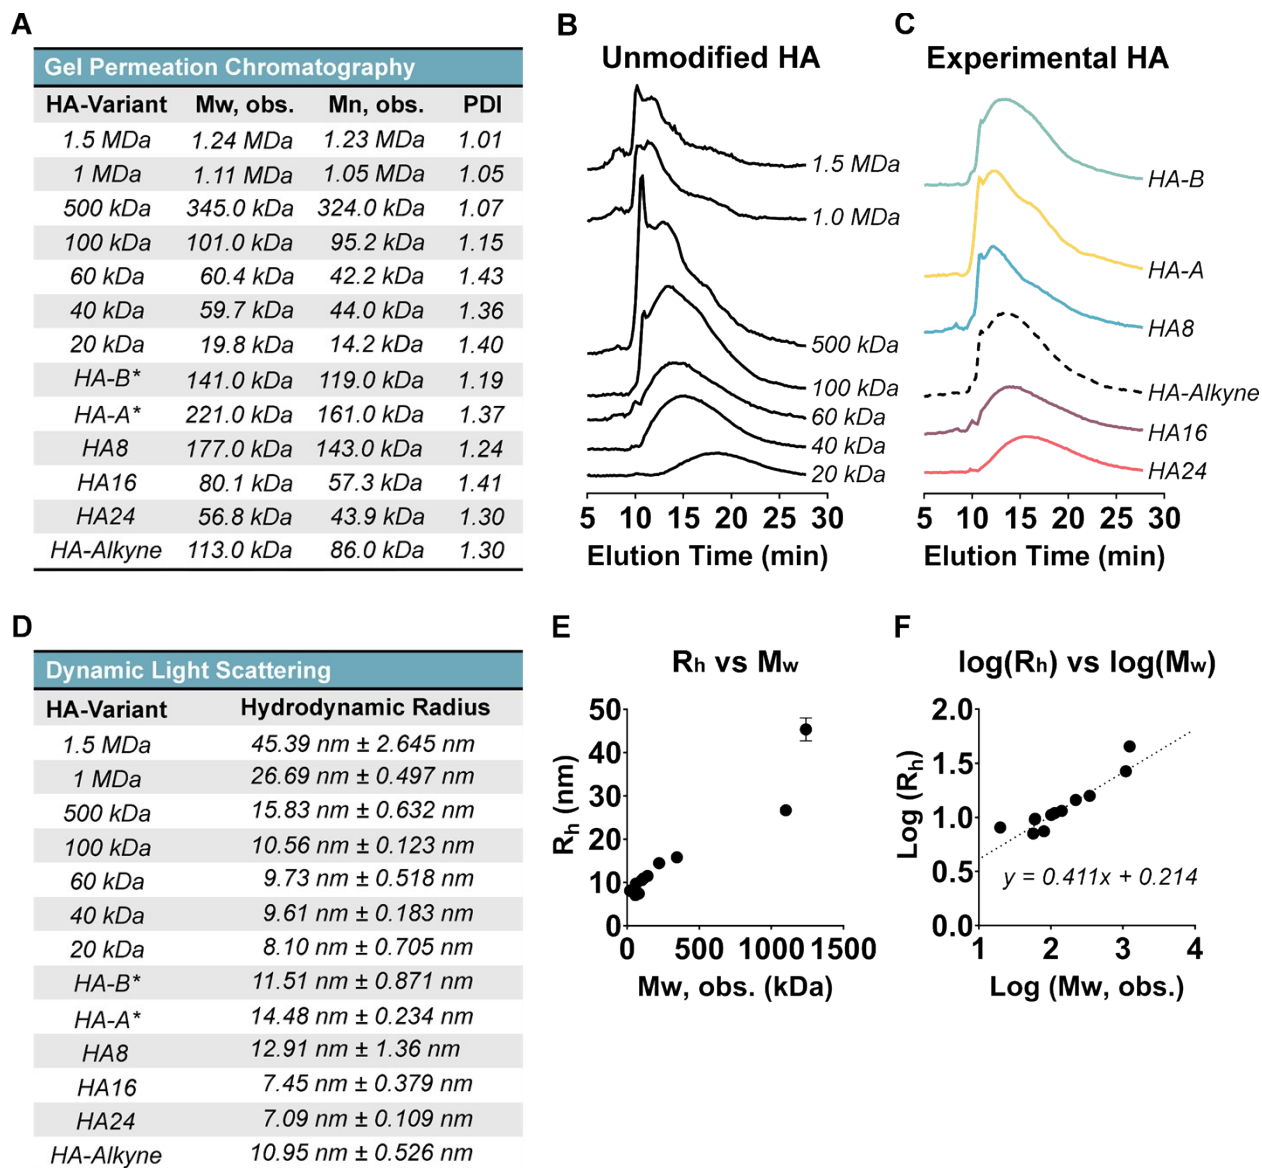

75 **Figure S6. Gel permeation chromatography (GPC) measurements of hyaluronans:** To characterize  
 76 the molecular weight ( $M_w$ ) of our different hyaluronan (HA) variants, we used gel-permeation  
 77 chromatography (GPC) on both reference unmodified H, and our experimental HA groups. (A) Tabulated  
 78 results showing the observed weight-average molecular weight ( $M_w$ , obs.), number-average molecular  
 79 weight ( $M_n$ , obs.), and polydispersity index (PDI) are shown. GPC measurements were able to accurately  
 80 determine the molecular weight of our unmodified control groups. HA modified by copper click chemistry  
 81 (HA-B\* and HA-A\*) appeared to increase in molecular weight, but this is likely due to the presence of bulky  
 82 side groups increasing their hydrodynamic radii and inflating the measured value. As expected, oxidized  
 83 HA samples (HA8, HA16, and HA24) decreased greatly from their starting molecular weight (1.5 MDa) as

## Electronic Supplementary Information

84 *a function of oxidation time. Representative GPC curves have been provided for (B) unmodified HA and*  
85 *our (C) experimental HA groups. Note: we used a specific refractive index increment ( $dn/dc$ ) value of 0.165*  
86 *to calculate the approximate values for all samples. (D) Using dynamic light scattering (DLS) we measured*  
87 *the hydrodynamic radii of unmodified HA controls and our modified HA groups. The hydrodynamic radius*  
88 *( $R_h$ ) and the  $M_w$ , obs. have been plotted both as (E) linear plots and (F) log-log plots.*

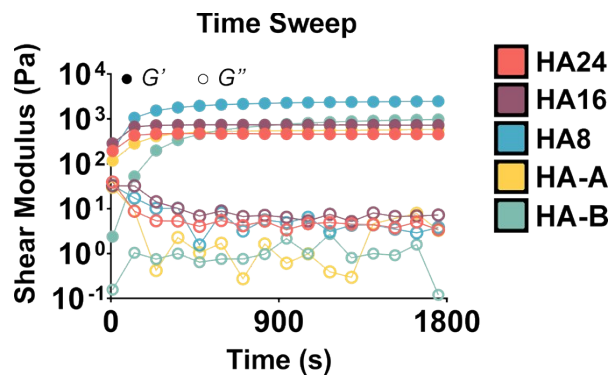

89 **Figure S7. Representative time sweeps:** Following mixing, our five gel formulations (all: 2% (w/v) ELP,  
90 1% (w/v) HA) were crosslinked for 30 min at room temperature. All five formulations began to gel almost  
91 immediately following mixing, and all formulations (except HA-B) had a storage modulus ( $G'$ ) > loss modulus  
92 ( $G''$ ) prior to the start of measurement. Typical plateau moduli following crosslinking were as follows: ~450  
93 Pa for HA24; ~730 Pa for HA16; ~2500 Pa for HA8; ~590 Pa for HA-A; ~ 980 Pa for HA-B.

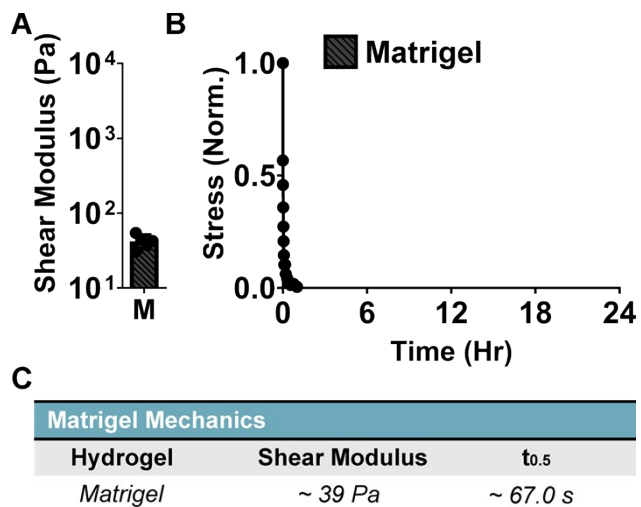

94 **Figure S8. Summary of Matrigel mechanics:** Summary mechanics of Matrigel using our prescribed  
 95 mechanical testing protocols. We found that Matrigel has a shear modulus of ~39 Pa and a stress  
 96 relaxation, as denoted by  $t_{0.5}$ , of ~67.0 s.

97 **Measuring Lower Critical Solution Temperature:**

98 The lower-critical solution temperatures (LCST) of our proteins were measured by taking  
99 absorbance measurements ( $\lambda = 300$  nm) in a circular dichroism (CD) spectrometer (J-1000,  
100 JASCO). Briefly, a 250  $\mu$ L sample of 1% (w/v; 10 mg mL<sup>-1</sup>) ELP both pre- and post-  
101 functionalization was made by dissolving lyophilized protein in 1X PBS overnight at 4 °C on a  
102 constant rotator. The following morning, 200  $\mu$ L of freshly dissolved sample was loaded into a  
103 pre-chilled (4 °C) 1-mm band-width quartz cuvette and then loaded into the CD spectrometer  
104 sample chamber. The absorbance spectra were measured at 1 °C increments over the  
105 temperature range 4 °C - 65 °C. To ensure adequate incubation, the temperature was elevated  
106 at 1 °C min<sup>-1</sup> and held at each degree increment for 30 seconds. To approximate the LCST for  
107 each sample, we first subtracted away a blank (PBS only) scan collected using the same protocol.  
108 Then, we normalized the curves by dividing each absorbance measurement collected by the  
109 maximum absorbance value over the length of the measurement. The LCST temperature range  
110 is defined as the approximate temperature where absorbance (norm.) = 0.5.

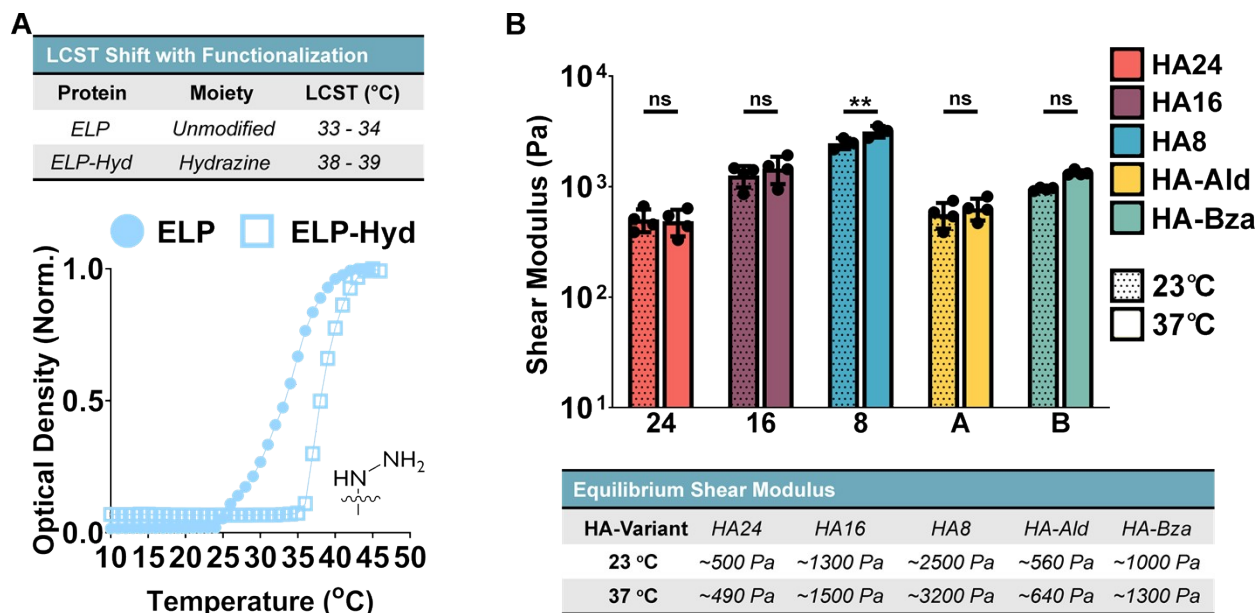

111 **Figure S9. Lower critical solution temperature (LCST) shift:** (A) The lower critical solution temperature  
 112 measurements of ELP pre- and post-modification with hydrazine moieties. (B) Shear moduli of crosslinked  
 113 gels at ambient (23 °C) and body (37 °C) temperatures. 2-Way ANOVA multiple comparison's test,  $\alpha = 0.05$ ,  
 114 post-hoc Bonferroni test,  $** p < 0.01$ , ns = not significant.

115 **Note: These videos have been uploaded as separate files. A brief description is listed**  
116 **below.**

117 **Figure S10. Representative injection videos:** (A) Representative video of injecting 50  $\mu\text{L}$  of HA24 (dyed  
118 red with food coloring for ease of visibility), (B) HA16 (dyed purple with food coloring for ease of visibility),  
119 (C) HA8 (dyed blue with food coloring for ease of visibility), (D) HA-A (dyed yellow with food coloring for  
120 ease of visibility), and (E) HA-B (dyed green with food coloring for ease of visibility) through a 30-G,  
121 manually hooked, needle by hand



122 **Note: This video has been uploaded as a separate file. A brief description is listed below.**

123 **Figure S11. Catheter injection video of HA16:** *To screen the potential for translatability of our hyaluronan*  
124 *and elastin-like protein (HELP) gel system, we tested the injection of 700  $\mu$ L HA16 (dyed dark green for*  
125 *ease of visibility) through a 150-cm catheter. Injections were done by hand. Note: the beginning of the video*  
126 *has been accelerated (x8). Total injection time is 3 min and 8 sec. For reference, the 30-G needles used in*  
127 *our study had an injection length of 0.8 cm and an 0.159 mm inner diameter compared to the Codman*  
128 *catheter which was 150 cm in length and had an inner diameter of 0.75 mm.*

129 **Post-Injection Mechanics Test:**

130 50  $\mu\text{L}$  of hydrogel were prepared as previously described and loaded into the back of a 30-G  
131 syringe. Hydrogels were crosslinked for 30 min and then injected, by hand, onto an ARG2  
132 rheometer (TA Instruments). Post-injection recovery was monitored at 1% strain and radial  
133 frequency of  $1 \text{ rad s}^{-1}$  over the course of 24 hr. Heavy mineral oil was used to fill the gap between  
134 the rheometer geometry and external environment to ensure hydration over the course of all  
135 measurements. Immediately following the 24-hr recovery period, the shear modulus for each  
136 sample was measured at  $23 \text{ }^\circ\text{C}$  using a non-destructive frequency sweep over the oscillatory  
137 frequency range of  $0.1 - 10 \text{ rad s}^{-1}$  at a fixed strain of 10%.

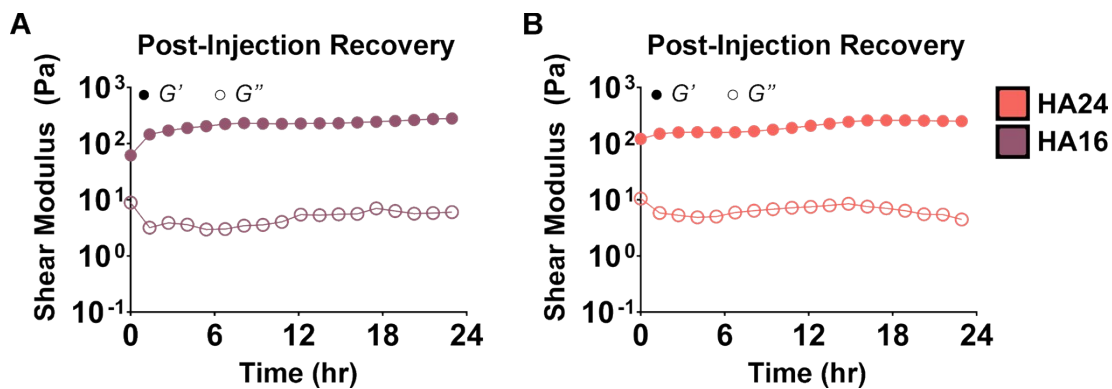

138 **Figure S12. Recovery experiment for HA16 and HA24:** 24-hr recovery experiment of 50  $\mu\text{L}$  of (A) HA16  
 139 and (B) HA24 post-injection at 1% strain and a frequency of  $1 \text{ rad s}^{-1}$ .

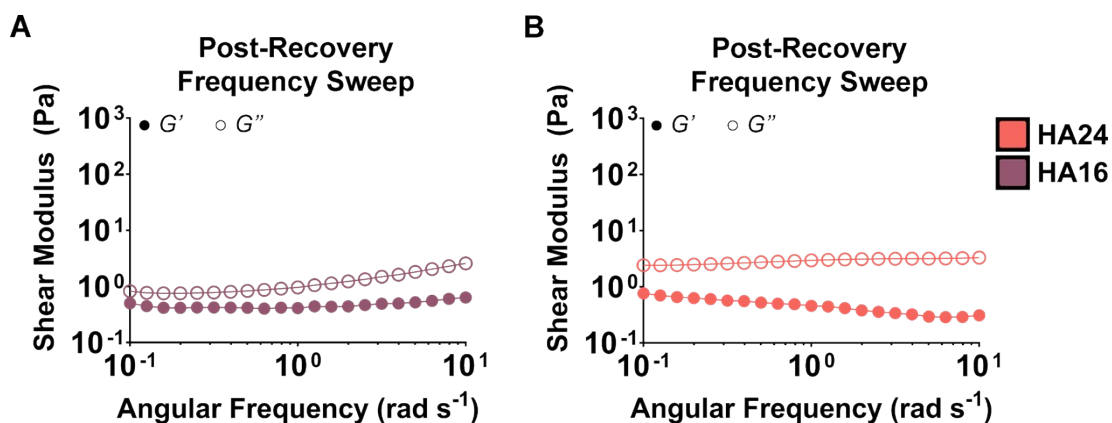

140 **Figure S13. Post-recovery frequency sweep:** After 24-hr of recovery post-injection we measured shear  
 141 stiffness of (A) HA16 and (B) HA24 via a frequency sweep at 10% strain and over a range of 0.1  
 142  $\text{rad s}^{-1}$  to  $10 \text{ rad s}^{-1}$ , as detailed in the methods section.

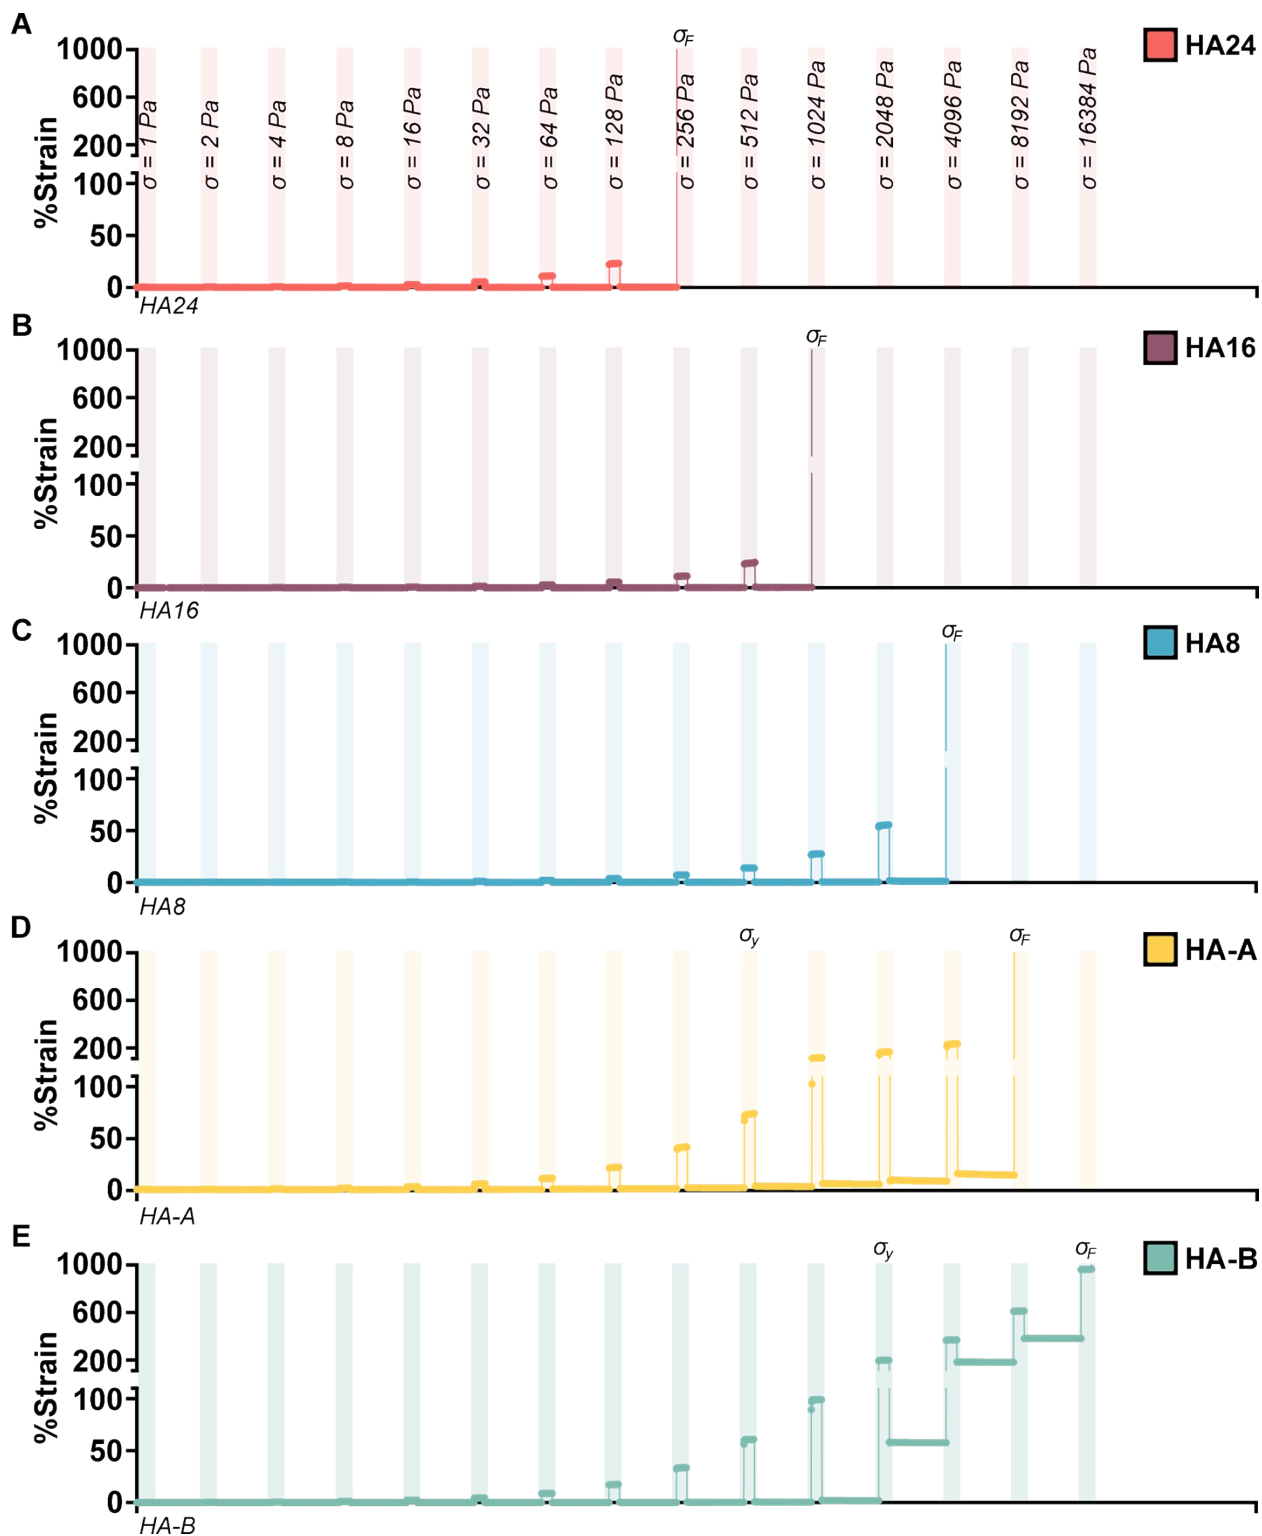

143 **Figure S14. Representative stress and strain curves:** Representative failure stress measurement tests  
 144 for (A) HA24, (B) HA16, (C) HA8, (D) HA-A, and (E) HA-B showing the measured strain over successive  
 145 stress steps (demarcated by a semi-transparent bar and corresponding stress) and relaxation steps. The

## Electronic Supplementary Information

146 *x-axis, for all plots indicates time (s), plotted linearly. The stress required to induce fracture is indicated by*  
147  *$\sigma_F$ . Note that the y-axis is broken into two parts: (1) 0 – 100 % strain and (2) 100 – 200% strain. The oxidized*  
148 *HELP (HA24, HA16, and HA8) groups reached much lower strain values (< 50%) prior to failure than the*  
149 *bio-conjugated variants, HA-A and HA-B, which experienced % strain > 100% prior to failure. Additionally,*  
150 *both HA-A and HA-B had evidence of a yielding behavior (% strain >> 0 post-relaxation ( $\sigma = 0$ )) and are*  
151 *denoted with a  $\sigma_y$ .*

152 **Labeling ELP with Cyanine 5**

153 To aid with the visualization of our HELP hydrogels post-injection, we labeled a single lysine group  
154 on a portion of our ELPs with a cyanine 5 (Cy5) NHS molecule (excitation: 651, emission: 670;  
155 Sigma 679011) via standard NHS-ester chemistry. Briefly, ELP was dissolved in anhydrous  
156 DMSO at an initial concentration of 6% (w/v) at room temperature (RT) under constant rotation.  
157 After dissolving, the reaction volume was diluted further with anhydrous DMF, dropwise, to a final  
158 concentration of 2% (w/v). Next, a 1 molar equivalent of activated Cy5-NHS ester was dissolved  
159 in anhydrous DMF (100 mg mL<sup>-1</sup>) and added dropwise to the 2% (w/v) ELP reaction mixture. Once  
160 added, the reaction vial was purged with nitrogen gas for 5 ~ 10 min. After purging, the reaction  
161 vial was covered with aluminum foil to prevent photo bleaching and the reaction was allowed to  
162 proceed overnight at RT.

163 To isolate the modified ELP-Cy5, the reaction volume was added, dropwise, into ice-cold  
164 diethyl ether to a final volumetric ratio 1:5 (reaction: ether) in a solvent-safe centrifugation tube.  
165 ELP-Cy5 was then collected by centrifugation (>18000 x g) at 4 °C for 30 min, decanted, and  
166 dried overnight. The dried ELP-Cy5 product is then dissolved in ultra-pure DI water at a final  
167 concentration of 2% (w/v) and dialyzed against 4 L of ultra-pure DI. The 4 L of dialysis water was  
168 routinely refreshed every 12 hr over the course of 3 days. The final dialyzed product was then  
169 sterilized using a 0.22- $\mu$ m syringe filter, frozen, and finally lyophilized for 3 days in a sterile, filtered  
170 50-mL tube. To verify the degree of functionalization, ELP-Cy5 can be characterized via NMR  
171 (below). If the ELP molecule has been sufficiently modified (~ 1 Cy5 molecule per ELP), ELP-Cy5  
172 can be further modified with a hydrazine molecule (ELP-Cy5-Hyd) following the previously listed  
173 protocol and incorporated into standard HELP gels to reach a desired level of fluorescence.

174 NMR Quantification:

175 Cy5 Functionalization: dissolve ~10 mg of ELP-Cy5 in ~750  $\mu$ L of deuterated DMSO and analyze  
176 by <sup>1</sup>H NMR (500 Hz, DMSO-d<sub>6</sub>): Tetramethyl silane (TMS; 0). Efficiency of modification is

## Electronic Supplementary Information

- 177 determined by comparing the integrated signal of the lysine peak ( $\delta$  2.75-1.65; unmodified 28H)
- 178 to the aromatic protons of tyrosine residues on ELP (8H each; centered around  $\delta$  7.00 and 6.62,).

180

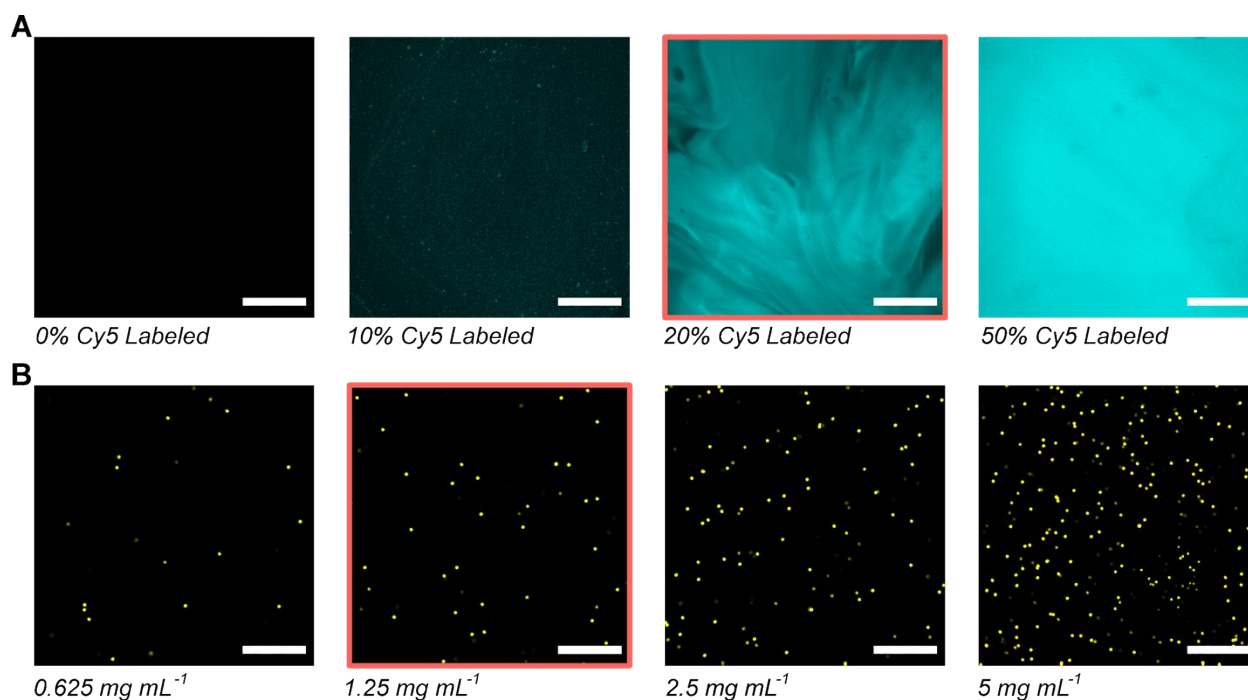

181 **Figure S15. Ex vivo hydrogel fluorescence and microsphere concentration determination:** To identify  
182 an appropriate level of ELP-cyanine-5 labeling and microsphere concentration for subsequent in vivo  
183 experiments, we prepared HELP gels with varying levels of (A) volume percent labeled ELP and (B)  
184 concentration of fluorescent microparticles. From our ex vivo screening, we opted to use 20% (v/v) ELP-  
185 Cy5-Hydrazine and 1.25 mg mL<sup>-1</sup> 10- $\mu$ m fluorescent particles (selections are outlined in red). Based on this  
186 image, we further estimated that a 50- $\mu$ L injection would have approximately ~70,110 microspheres. Note:  
187 all images represent 20- $\mu$ m thick z-stacks to emulate the intended tissue thickness; all scale bars denote  
188 250  $\mu$ m.



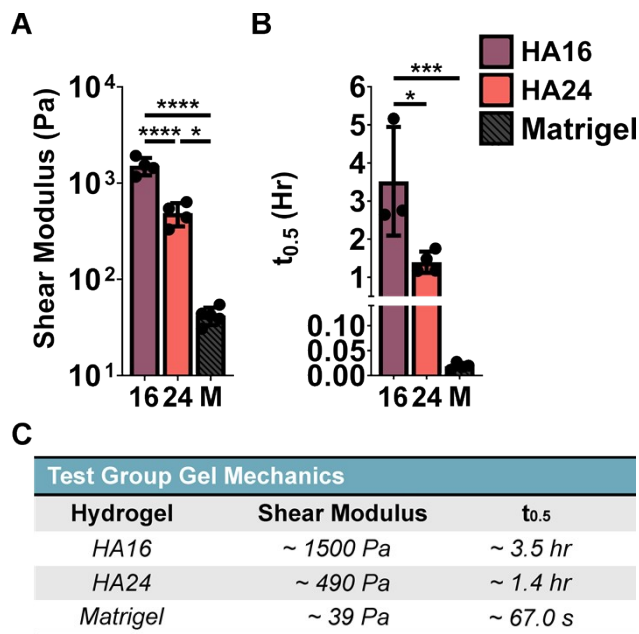

All data previously shown

189 **Figure S16. Summary of test group mechanics:** Summary of the (A) shear moduli and (B) stress  
 190 relaxation rates of HA16, HA24, and Matrigel. (C) Average values are reported for ease of comparison.  
 191 Note: these data have been previously shown, but are recompiled here for ease of direct comparison.  
 192 Collectively, these gels established “low” (~40 Pa), “medium” (~500 Pa), and “high” (~1500 Pa) stiffness  
 193 gels for our in vivo retention study. Statistical test: one-way ANOVA,  $\alpha = 0.05$ , post-hoc Tukey test. \*  $p <$   
 194  $0.05$ ; \*\*\*  $p < 0.001$ ; \*\*\*\*  $p < 0.0001$ .

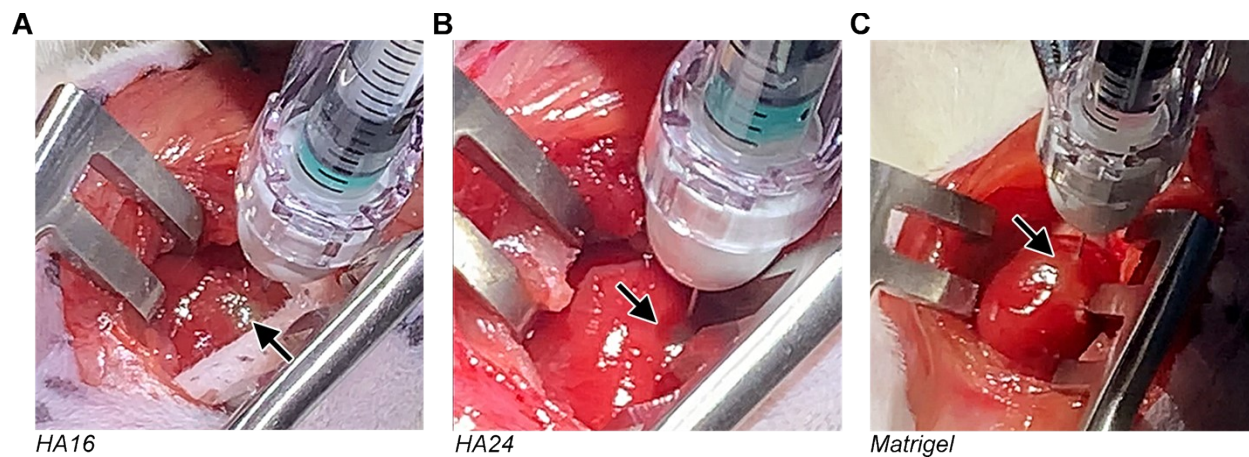

195 **Figure S17. Representative injection images:** Representative images showing injections of 50  $\mu\text{L}$  of (A)  
196 fluorescently labeled HA16, (B) fluorescently labeled HA24, and (C) Matrigel, each with a final concentration  
197 of  $1.25 \text{ mg mL}^{-1}$  10- $\mu\text{m}$  fluorescent microspheres. Arrows indicate evidence of material injection of the  
198 material, indicated by the formation of a bolus and slight discoloration of the tissue.

199 **Injection Scoring Procedure:**

200 For injection scoring, we devised a 4-part scoring system that assessed clinically relevant  
201 concerns in cardiothoracic surgical injection paradigms: (1) the observable amount of material  
202 reflux (on a scale of 0 - 3 points ranging from no visibly remaining material to no material reflux),  
203 (2) ease of injection (on a scale of 0 - 3 points ranging from no smoothness in injection to  
204 controlled smooth injection), (3) degree of bleeding post-injection (on a scale of 0 - 3 points  
205 ranging from excessive bleeding with risk of death to no spot bleeding), and (4) correct location  
206 of the injection site (on a binary scale of 0 - 1 point with the injection visually being in the incorrect  
207 or correct location). These scores were tabulated for each gel group at both time points for a total  
208 possible score of 10 points. Scores were assigned by an external observer, blind to the injection  
209 group and time point.

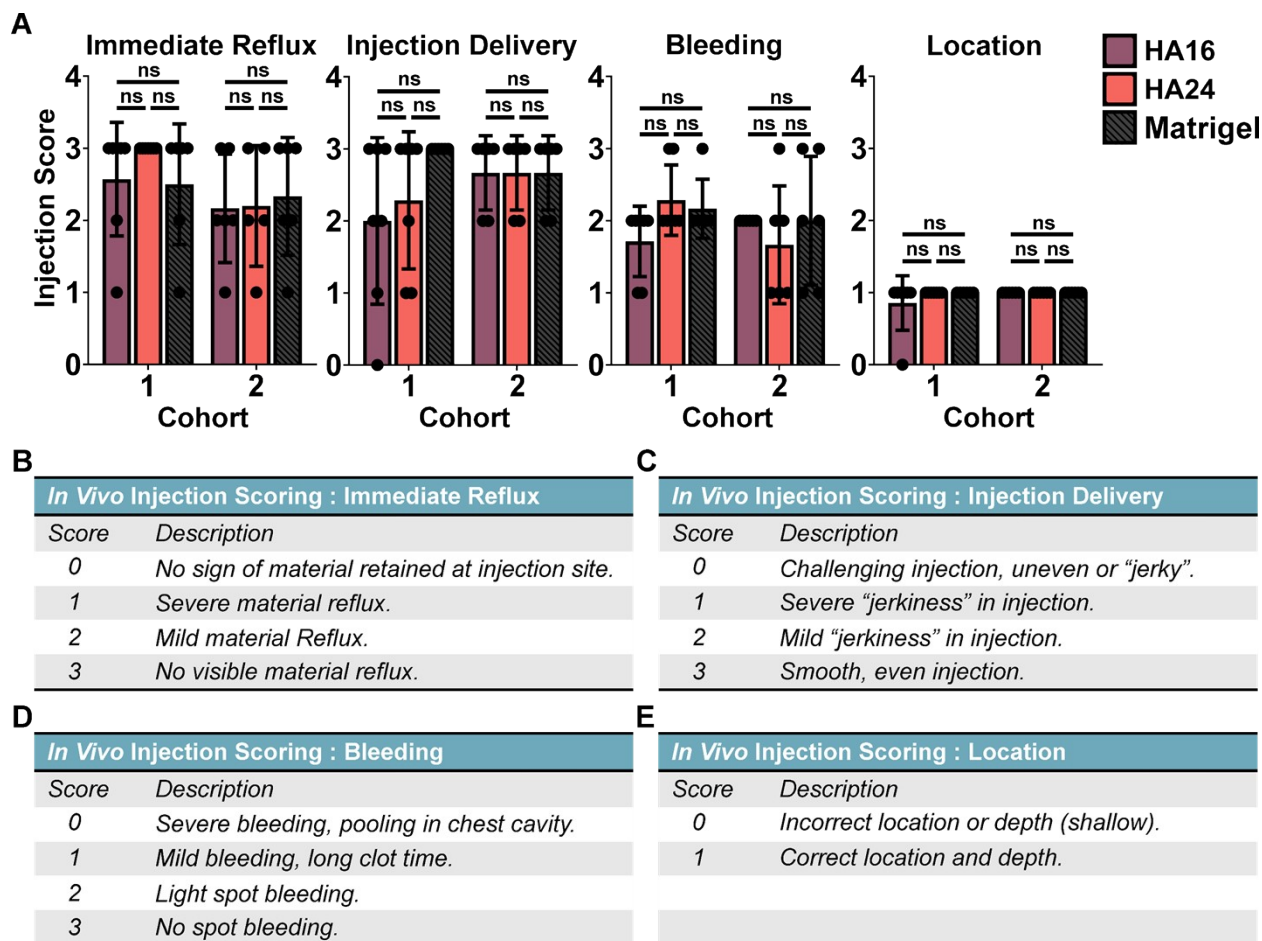

210 **Figure S18. Injection scoring:** To probe the possibility that retention could be influenced by the quality of  
 211 our injections, we devised a 4-part scoring system that looked at: (1) the observable amount of reflux, (2)  
 212 ease of injection, (3) degree of bleeding post-injection, and (4) correct location of the injection site. (A)  
 213 These scores were tabulated for each gel group for both cohorts, 1 and 2, which correspond to 1 and 7 day  
 214 time points post-injection, respectively. Scores were assigned by an external observer, blind to the injection  
 215 group and time point. (B – D) A breakdown of the scoring scheme has been provided for reference. Notably,  
 216 we found no significant differences in the quality of our injections between our groups. Statistical test: two-  
 217 way ANOVA,  $\alpha = 0.05$ , post-hoc Tukey test, not significant = *n.s.*

Electronic Supplementary Information

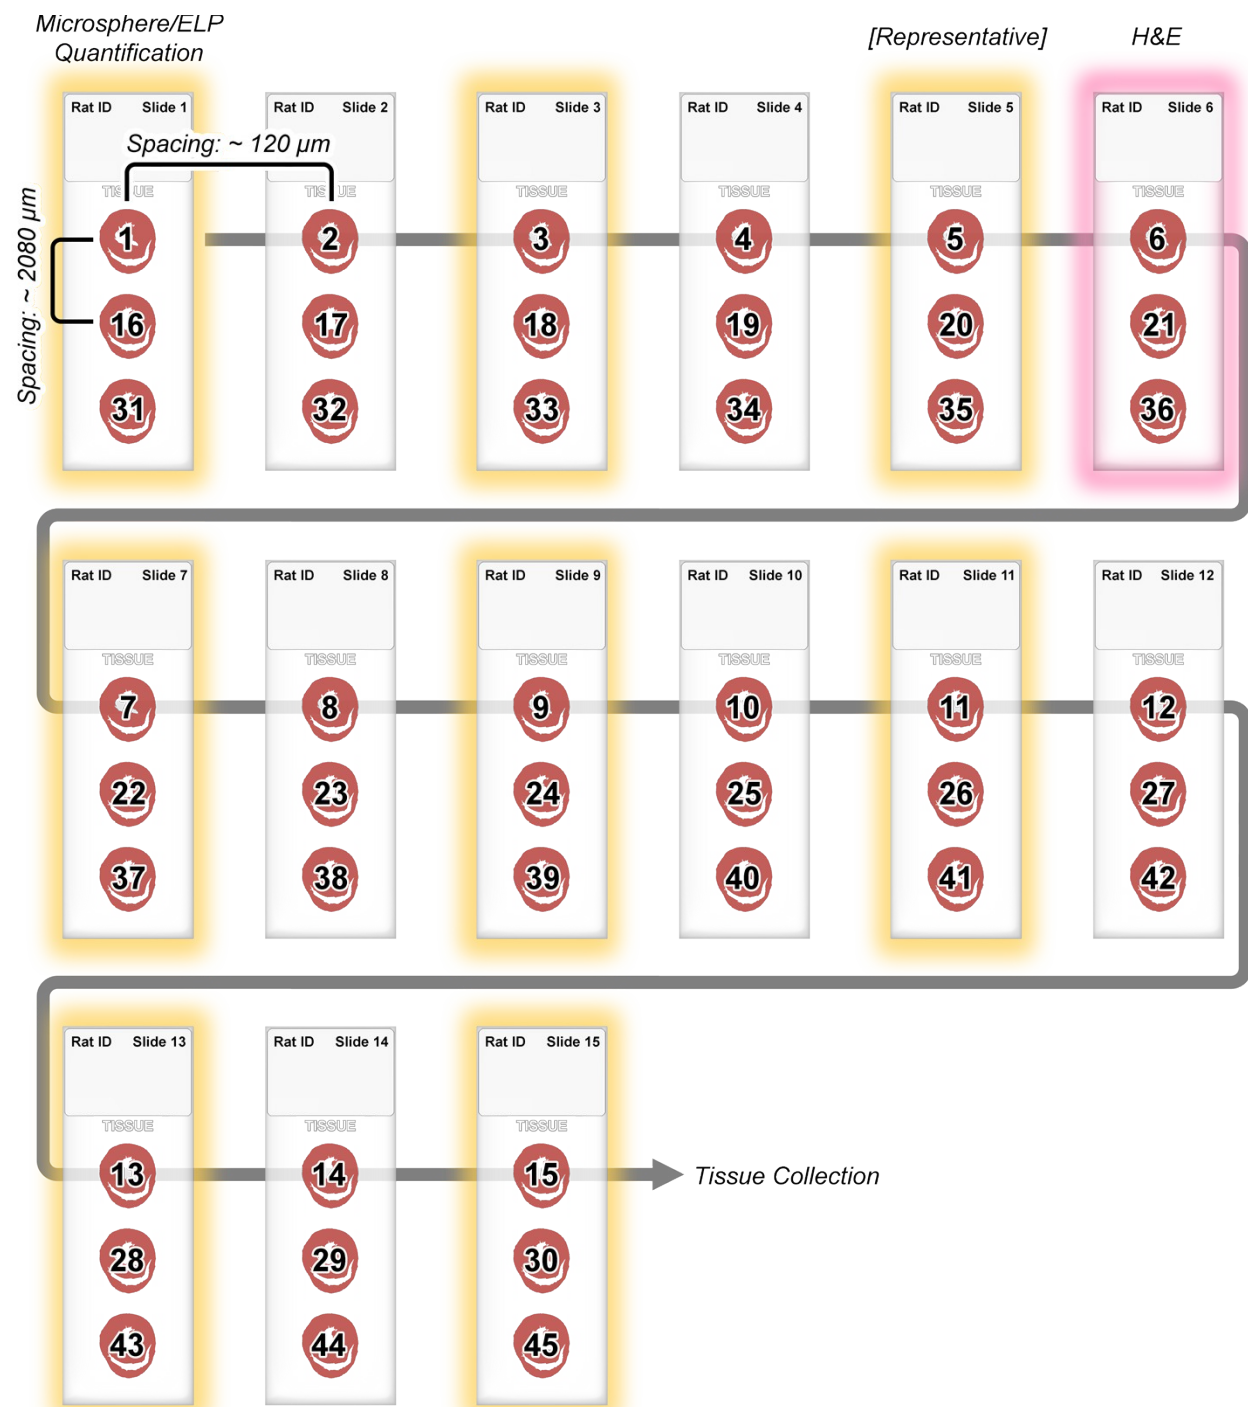

218 **Figure S19. Tissue sectioning schematic:** To maintain a consistent and unbiased survey of our different  
 219 test groups, all tissues were sectioned and sampled according to the above scheme. Briefly, 15 gelatin-  
 220 coated slides were collected from each animal for analysis. Serial slices (20-μm thick) of heart tissue were  
 221 made, and every seventh slice was collected; i.e., slides were prepared from tissue slices spaced

## Electronic Supplementary Information

222 *approximately ~120- $\mu$ m apart. Importantly, the exact number of tissue slices between each collected tissue*  
223 *sample was recorded and used in the final quantification. In the above diagram, we have numbered each*  
224 *tissue section (1 – 45) to reflect the general ordering of sample collection, where the first 15 samples (1-15)*  
225 *were placed at the top of each slide, the next 15 samples (16 – 30) were collected in the middle row, and*  
226 *the last 15 were collected on the bottom row (31 – 45). By sectioning tissue this way, each slide spanned*  
227 *approximately 4 mm in height and provided a rapid way of surveying a large amount of tissue with relatively*  
228 *few slides needing to be imaged. From the 15 total slides, 8 (slides 1, 3, 5, 7, 9, 11, 13, and 15) were*  
229 *collected from each animal and imaged for microspheres and elastin-like protein (ELP) according to our*  
230 *described methods. To select a slide for Hematoxylin & Eosin (H&E) staining, we designated from those 8*  
231 *slides one that was ‘representative’ (having qualities numerically and morphologically indicative of that*  
232 *particular injection) and a slide adjacent to that was then selected for histological staining.*

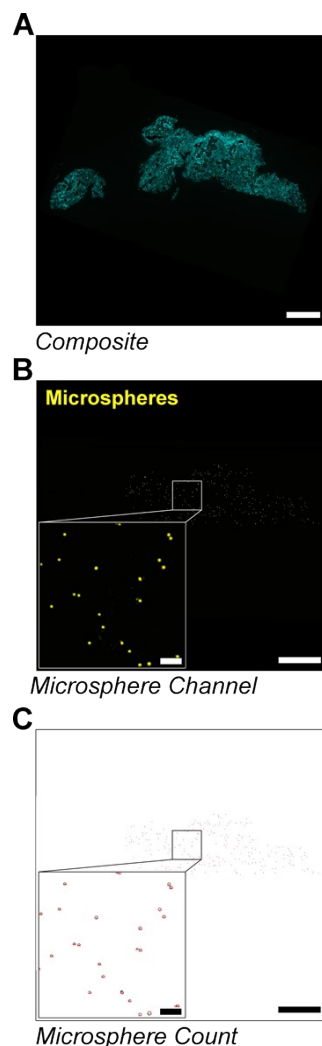

233 **Figure S20. Example images of microsphere retention quantification:** *Tabulation of microsphere count*  
234 *was carried out by automated quantification of fluorescent images. (A) First, 45, 20- $\mu$ m thick, tissue*  
235 *sections were extracted semi-periodically with a cryostat from a larger 5-mm section of rat heart collected*  
236 *and fixed according to our previously stated methods (see **Figure S19**). Tissue sections were imaged with*  
237 *aid of an inverted fluorescent microscope for evidence of injected cargo: ELP and/or fluorescent*  
238 *microspheres. (B) From composite images we isolated the microsphere channel and saved them from each*  
239 *tissue slice. (C) These images were then converted to binary images (using a constant threshold value)*  
240 *and the number of microspheres were tallied for each slice using a particle counter in ImageJ. To generate*  
241 *more accurate counts, tallies from each image slice were then checked for instances of ‘clustering’ (multiple*  
242 *microspheres being counted as one) by a secondary Python script that divided the cross-sectional area of*  
243 *each microsphere by the average area of an individual microsphere, and extra counts were added*

## Electronic Supplementary Information

244 *accordingly for each slice. Note: scale bar on low magnification images represents 1 mm, scale bar on high-*  
245 *magnification images represents 100  $\mu\text{m}$ .*



246 **Note: This file has been uploaded separately. A brief description is listed below:**

247

248 **Figure S21. Python script for post-processing microsphere count:** *A Python script was written and*  
249 *used to account for microsphere 'clustering' which superficially undercounted the number of microspheres*  
250 *in our captured images.*

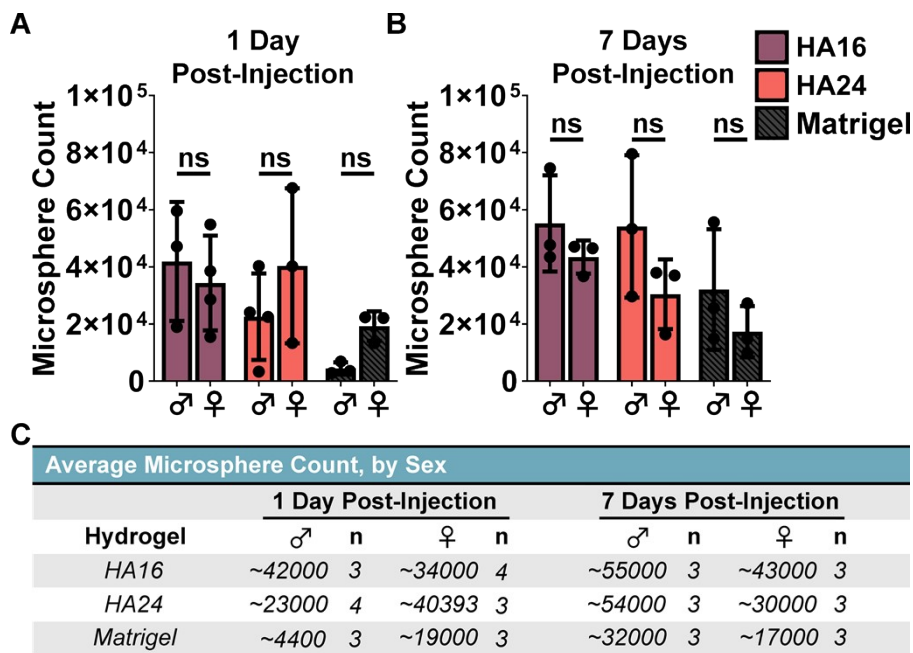

251 **Figure S22. Sex-based differences in microsphere retention:** To investigate the possibility of any sex-  
 252 related differences, we plotted the average microsphere count for each hydrogel, by sex, for both (A) 1 day  
 253 and (B) 7 days post-injection. Importantly, we did not observe any significant differences based on sex.  
 254 Generally, it appeared that male rats had a greater degree of retention, but not in a statistically significant  
 255 manner. (C) The results have been additionally summarized for reference. Statistical test: two-way ANOVA,  
 256  $\alpha = 0.05$ , post-hoc Tukey test, not significant = n.s.

257 **Supplemental References:**

- 258 [1] Y.-C. Chen, W.-Y. Su, S.-H. Yang, A. Gefen, F.-H. Lin, In situ forming hydrogels composed of  
259 oxidized high molecular weight hyaluronic acid and gelatin for nucleus pulposus regeneration,  
260 *Acta Biomater.* 9 (2013) 5181–5193. <https://doi.org/10.1016/j.actbio.2012.09.039>.

261
